# Supplementary material for: Mortality and kidnapping estimates for the Yazidi population in the area of Mount Sinjar, Iraq, in August 2014: A retrospective household survey
Source: PubMed Central journal article supplement (PMC5423550; doi:10.1371/journal.pmed.1002297), 2017-05-09
Supplement: pmed.1002297.s002.pdf [file pmed.1002297.s002.pdf]

## STROBE Statement

|                              | Item<br>No | Recommendation                                                                                                                                                                       | Location                   |
|------------------------------|------------|--------------------------------------------------------------------------------------------------------------------------------------------------------------------------------------|----------------------------|
| <b>Title and abstract</b>    | 1          | (a) Indicate the study's design with a commonly used term in the title or the abstract                                                                                               | Title and Abstract, par. 1 |
|                              |            | (b) Provide in the abstract an informative and balanced summary of what was done and what was found                                                                                  | Abstract, par. 2           |
| <b>Introduction</b>          |            |                                                                                                                                                                                      |                            |
| Background/rationale         | 2          | Explain the scientific background and rationale for the investigation being reported                                                                                                 | Introduction, par. 3-6     |
| Objectives                   | 3          | State specific objectives, including any prespecified hypotheses                                                                                                                     | Introduction, par. 6       |
| <b>Methods</b>               |            |                                                                                                                                                                                      |                            |
| Study design                 | 4          | Present key elements of study design early in the paper                                                                                                                              | Methods, par. 3,4          |
| Setting                      | 5          | Describe the setting, locations, and relevant dates, including periods of recruitment, exposure, follow-up, and data collection                                                      | Methods, par. 2,7          |
| Participants                 | 6          | Give the eligibility criteria, and the sources and methods of selection of participants.                                                                                             | Methods, par. 3,7          |
| Variables                    | 7          | Clearly define all outcomes, exposures, predictors, potential confounders, and effect modifiers. Give diagnostic criteria, if applicable                                             | Methods, par. 9            |
| Data sources/<br>measurement | 8          | For each variable of interest, give sources of data and details of methods of assessment (measurement). Describe comparability of assessment methods if there is more than one group | Methods, par. 4,9          |
| Bias                         | 9          | Describe any efforts to address potential sources of bias                                                                                                                            | Methods, par. 11,12        |
| Study size                   | 10         | Explain how the study size was arrived at                                                                                                                                            | Methods, par. 2            |
| Quantitative variables       | 11         | Explain how quantitative variables were handled in the analyses. If applicable, describe which groupings were chosen and why                                                         | Methods, par. 9            |
| Statistical methods          | 12         | (a) Describe all statistical methods, including those used to control for confounding                                                                                                | Methods, par. 9            |
|                              |            | (b) Describe any methods used to examine subgroups and interactions                                                                                                                  | Methods, par. 9            |
|                              |            | (c) Explain how missing data were addressed                                                                                                                                          | n/a                        |
|                              |            | (d) If applicable, describe analytical methods taking account of sampling strategy                                                                                                   | Methods, par. 8            |
|                              |            | (e) Describe any sensitivity analyses                                                                                                                                                | Methods, par. 12           |

| <b>Results</b>           |    |                                                                                                                                                                                                              |                      |
|--------------------------|----|--------------------------------------------------------------------------------------------------------------------------------------------------------------------------------------------------------------|----------------------|
| Participants             | 13 | (a) Report numbers of individuals at each stage of study—eg numbers potentially eligible, examined for eligibility, confirmed eligible, included in the study, completing follow-up, and analysed            | Results, par. 1,2    |
|                          |    | (b) Give reasons for non-participation at each stage                                                                                                                                                         | n/a                  |
|                          |    | (c) Consider use of a flow diagram                                                                                                                                                                           | n/a                  |
| Descriptive data         | 14 | (a) Give characteristics of study participants (eg demographic, clinical, social) and information on exposures and potential confounders                                                                     | Results, par. 1,2    |
|                          |    | (b) Indicate number of participants with missing data for each variable of interest                                                                                                                          | n/a                  |
| Outcome data             | 15 | Report numbers of outcome events or summary measures over time                                                                                                                                               | Results, par. 2      |
| Main results             | 16 | (a) Give unadjusted estimates and, if applicable, confounder-adjusted estimates and their precision (eg, 95% confidence interval). Make clear which confounders were adjusted for and why they were included | Results, par. 3      |
|                          |    | (b) Report category boundaries when continuous variables were categorized                                                                                                                                    | n/a                  |
|                          |    | (c) If relevant, consider translating estimates of relative risk into absolute risk for a meaningful time period                                                                                             | n/a                  |
| Other analyses           | 17 | Report other analyses done—eg analyses of subgroups and interactions, and sensitivity analyses                                                                                                               | Results, par. 5,6    |
| <b>Discussion</b>        |    |                                                                                                                                                                                                              |                      |
| Key results              | 18 | Summarise key results with reference to study objectives                                                                                                                                                     | Discussion, par. 1   |
| Limitations              | 19 | Discuss limitations of the study, taking into account sources of potential bias or imprecision. Discuss both direction and magnitude of any potential bias                                                   | Discussion, par. 5,6 |
| Interpretation           | 20 | Give a cautious overall interpretation of results considering objectives, limitations, multiplicity of analyses, results from similar studies, and other relevant evidence                                   | Discussion, par. 2-4 |
| Generalisability         | 21 | Discuss the generalisability (external validity) of the study results                                                                                                                                        | Discussion, par. 5,6 |
| <b>Other information</b> |    |                                                                                                                                                                                                              |                      |
| Funding                  | 22 | Give the source of funding and the role of the funders for the present study and, if applicable, for the original study on which the present article is based                                                | Funding section      |
